# Supplementary material for: Insights into soil NO emissions and the contribution to surface ozone formation in China
Source: Copernicus journal article supplement (doi:10.5194/acp-23-14919-2023), 2023-12-05
Supplement: Supplementary file 1 [file acp-23-14919-2023-supplement.pdf]

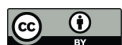

*Supplement of*

## **Insights into soil NO emissions and the contribution to surface ozone formation in China**

**Ling Huang et al.**

*Correspondence to:* Li Li (lily@shu.edu.cn)

The copyright of individual parts of the supplement might differ from the article licence.

## Section S1: Details of the BDSNP algorithm

### Biome-specific emission factor

$$A'_{biome} = A_{biome} + N_{avail} \times E \quad \text{Eq. S1}$$

### Temperature and soil moisture dependence factor

$$f(T) = e^{k[^\circ\text{C}^{-1}]T} \quad k = 0.103 \pm 0.04 \quad \text{Eq. S2}$$

$$g(\theta) = a\theta e^{-b\theta^2} \quad \text{Eq. S3}$$

### Pulsing

$$P(l_{dry}, t) = [13.01 \ln(l_{dry}) - 53.6] \times e^{-ct} \quad c = 0.068 \text{ h}^{-1} \quad \text{Eq. S4}$$

P represents the magnitude of the peak flux relative to the pre-wetting flux, and the constant c is a rate constant representing the rise/fall time of the pulse. The value of  $l_{dry}$  is the antecedent dry period in hours.

### Soil N content

$$N_{avail}(t) = N_{avail}(0)e^{-t/\tau} + F \times \tau \times (1 - e^{-t/\tau}) \quad \text{Eq. S5}$$

where  $N_{avail}$  is the mass of available N in the soil ( $\text{ng N m}^{-2}$ ), F is the application rate, and  $\tau$  is a decay lifetime.

**Table S1** Division of regions.

| <b>Region</b>   | <b>Provinces</b>                                              |
|-----------------|---------------------------------------------------------------|
| Northeast China | Liaoning, Heilongjiang, Jilin                                 |
| North China     | Hebei, Inner Mongolia, Tianjin, Beijing, Shanxi               |
| Central China   | Henan, Hubei, Hunan                                           |
| East China      | Fujian, Jiangsu, Shandong, Zhejiang, Shanghai, Anhui, Jiangxi |
| South China     | Hainan, Guangdong, Guangxi                                    |
| Southwest China | Tibet, Sichuan, Yunnan, Chongqing, Guizhou                    |
| Northwest China | Xinjiang, Qinghai, Gansu, Ningxia, Shaanxi                    |

**Table S2** Differences of fertilizer applied between the default dataset and the statistical yearbook.

| Province/<br>Region               | Amount of nitrogen fertilizer<br>from Potter's dataset (Tg N) | Statistical yearbook for year 2018           |                                             |                                                                 | Relative<br>difference (%) |
|-----------------------------------|---------------------------------------------------------------|----------------------------------------------|---------------------------------------------|-----------------------------------------------------------------|----------------------------|
|                                   |                                                               | Amount of pure nitrogen<br>fertilizer (Tg N) | Amount of NPK compound<br>fertilizer (Tg N) | Total (pure nitrogen fertilizer +<br>1/3 NPK fertilizer) (Tg N) |                            |
| Gansu                             | 0.48                                                          | 0.33                                         | 0.27                                        | 0.42                                                            | -13.7                      |
| Ningxia                           | 0.12                                                          | 0.16                                         | 0.15                                        | 0.21                                                            | 45.6                       |
| Qinghai                           | 0.11                                                          | 0.03                                         | 0.03                                        | 0.05                                                            | -146.7                     |
| Shaanxi                           | 0.59                                                          | 0.89                                         | 0.99                                        | 1.22                                                            | 51.2                       |
| Xinjiang                          | 0.40                                                          | 1.10                                         | 0.59                                        | 1.30                                                            | 68.8                       |
| <b><i>Northwest<br/>China</i></b> | <b><i>1.71</i></b>                                            | <b><i>2.52</i></b>                           | <b><i>2.03</i></b>                          | <b><i>3.19</i></b>                                              | <b><i>46.6</i></b>         |
| Henan                             | 1.58                                                          | 2.02                                         | 3.37                                        | 3.14                                                            | 49.7                       |
| Hubei                             | 0.91                                                          | 1.13                                         | 1.08                                        | 1.49                                                            | 38.6                       |
| Hunan                             | 0.95                                                          | 0.94                                         | 0.81                                        | 1.21                                                            | 21.4                       |
| <b><i>Central<br/>China</i></b>   | <b><i>3.45</i></b>                                            | <b><i>4.09</i></b>                           | <b><i>5.26</i></b>                          | <b><i>5.84</i></b>                                              | <b><i>41.0</i></b>         |
| Guizhou                           | 0.63                                                          | 0.40                                         | 0.30                                        | 0.50                                                            | -25.5                      |
| Sichuan                           | 1.28                                                          | 1.12                                         | 0.60                                        | 1.32                                                            | 3.2                        |
| Tibet                             | 0.19                                                          | 0.01                                         | 0.02                                        | 0.02                                                            | -728.3                     |
| Yunnan                            | 0.74                                                          | 1.05                                         | 0.56                                        | 1.24                                                            | 40.5                       |

|                                   |             |             |             |             |             |
|-----------------------------------|-------------|-------------|-------------|-------------|-------------|
| Chongqing                         | 0.46        | 0.46        | 0.25        | 0.54        | 14.8        |
| <b><i>Southwest<br/>China</i></b> | <b>3.30</b> | <b>3.05</b> | <b>1.74</b> | <b>3.63</b> | <b>9.1</b>  |
| Guangdong                         | 0.75        | 0.89        | 0.71        | 1.12        | 33.3        |
| Guangxi                           | 0.84        | 0.74        | 0.95        | 1.06        | 20.4        |
| Hainan                            | 0.13        | 0.15        | 0.22        | 0.22        | 41.7        |
| <b><i>South China</i></b>         | <b>1.72</b> | <b>1.77</b> | <b>1.88</b> | <b>2.40</b> | <b>28.4</b> |
| Anhui                             | 1.03        | 0.96        | 1.60        | 1.49        | 30.7        |
| Fujian                            | 0.34        | 0.42        | 0.31        | 0.52        | 35.5        |
| Jiangsu                           | 0.97        | 1.46        | 0.96        | 1.77        | 45.5        |
| Jiangxi                           | 0.67        | 0.34        | 0.53        | 0.52        | -29.9       |
| Shandong                          | 1.45        | 1.31        | 2.12        | 2.01        | 27.8        |
| Shanghai                          | 0.08        | 0.04        | 0.04        | 0.05        | -64.2       |
| Zhejiang                          | 0.48        | 0.40        | 0.23        | 0.48        | 0.0         |
| <b><i>East China</i></b>          | <b>5.02</b> | <b>4.92</b> | <b>5.79</b> | <b>6.85</b> | <b>26.7</b> |
| Beijing                           | 0.09        | 0.03        | 0.03        | 0.04        | -106.6      |
| Hebei                             | 1.15        | 1.14        | 1.50        | 1.64        | 29.8        |
| Inner<br>Mongolia                 | 0.74        | 0.86        | 0.77        | 1.12        | 33.6        |
| Shanxi                            | 0.48        | 0.25        | 0.64        | 0.47        | -2.6        |
| Tianjin                           | 0.05        | 0.06        | 0.08        | 0.08        | 40.7        |

|                            |             |  |             |  |             |  |             |  |             |
|----------------------------|-------------|--|-------------|--|-------------|--|-------------|--|-------------|
| <i>North China</i>         | <b>2.51</b> |  | <b>2.35</b> |  | <b>3.03</b> |  | <b>3.35</b> |  | <b>25.2</b> |
| Heilongjiang               | 0.86        |  | 0.84        |  | 0.78        |  | 1.10        |  | 21.3        |
| Jilin                      | 0.51        |  | 0.58        |  | 1.50        |  | 1.08        |  | 52.8        |
| Liaoning                   | 0.53        |  | 0.55        |  | 0.68        |  | 0.78        |  | 31.9        |
| <i>Northeast<br/>China</i> | <b>1.90</b> |  | <b>1.97</b> |  | <b>2.96</b> |  | <b>2.95</b> |  | <b>35.6</b> |
| Total                      | 19.60       |  | 20.65       |  | 22.69       |  | 28.22       |  | 30.5        |

**Table S3** Model configurations of WRF and CAMx.

| Items                                    | WRF                                                                   | CAMx                                                                                |
|------------------------------------------|-----------------------------------------------------------------------|-------------------------------------------------------------------------------------|
| Version                                  | 3.7                                                                   | 7.0                                                                                 |
| Gas-Phase chemistry                      |                                                                       | Carbon Bond chemistry (CB6) (Yarwood et al., 2010)                                  |
| Aerosol module                           |                                                                       | CF Scheme / ISORROPIA                                                               |
| Aqueous-phase chemistry                  |                                                                       | Updated mechanism of the Regional Acid Deposition Model (RADM) (Chang et al., 1987) |
| Planet boundary scheme                   | The Yonsei University Scheme (YSU) (Hong et al., 2006)                |                                                                                     |
| Land surface                             | NOAH (Ek et al., 2003)                                                |                                                                                     |
| Microphysics                             | Morrison double-moment scheme (Morrison et al., 2009)                 |                                                                                     |
| Shortwave radiation                      | RRTMG shortwave (Iacono et al., 2008)                                 |                                                                                     |
| Longwave radiation                       | RRTMG scheme (Iacono et al., 2008)                                    |                                                                                     |
| Boundary conditions / initial conditions | 1°×1° grids FNL Operational Global Analysis data archived at the GDAS | MOZART (Emmons et al., 2010)                                                        |
| Dry deposition and wet deposition        |                                                                       | Zhang et al. (2003)                                                                 |

**Table S4** Statistical index formula.

| No. | Index                               | Formula                                                                                                          | Note                                  |
|-----|-------------------------------------|------------------------------------------------------------------------------------------------------------------|---------------------------------------|
| 1   | Pearson correlation coefficient (R) | $\frac{\sum[(P_j - \bar{P}) \times (O_j - \bar{O})]}{\sqrt{\sum(P_j - \bar{P})^2 \times \sum(O_j - \bar{O})^2}}$ | Unitless, $-1 \leq R \leq 1$          |
| 2   | mean bias (MB)                      | $\frac{\sum(P_j - O_j)}{N}$                                                                                      | concentration unit                    |
| 3   | root-mean-square error (RMSE)       | $\sqrt{\frac{\sum(P_j - O_j)^2}{N}}$                                                                             | concentration unit                    |
| 4   | normalized mean bias (NMB)          | $\frac{\sum(P_j - O_j)}{\sum O_j} \times 100$                                                                    | $-100\% \leq \text{NMB} \leq +\infty$ |
| 5   | normalized mean error (NME)         | $\frac{\sum P_j - O_j }{\sum O_j} \times 100$                                                                    | $0\% \leq \text{NME} \leq +\infty$    |

**Table S5** Soil NO emissions\* and ratio of soil NO to anthropogenic NO<sub>x</sub> by different regions in China for 2018.

| <b>Region</b>   | <b>Annual Soil NO emissions (Gg)</b> | <b>Soil NO emissions during June-August (Ratio of annual totals)</b> | <b>Ratio of soil NO/anthropogenic NO<sub>x</sub></b> | <b>Ratio soil NO/anthropogenic NO<sub>x</sub> (June-August)</b> |
|-----------------|--------------------------------------|----------------------------------------------------------------------|------------------------------------------------------|-----------------------------------------------------------------|
| Northeast China | 94.2                                 | 63.7 (67.6%)                                                         | 12.0%                                                | 36.0%                                                           |
| North China     | 200.5                                | 118.1 (58.9%)                                                        | 14.9%                                                | 36.5%                                                           |
| Central China   | 281.4                                | 146.7 (52.1%)                                                        | 35.3%                                                | 74.0%                                                           |
| East China      | 264.3                                | 138.4 (52.4%)                                                        | 12.8%                                                | 26.8%                                                           |
| South China     | 71.4                                 | 20.1 (28.2%)                                                         | 14.3%                                                | 15.8%                                                           |
| Southwest China | 87.6                                 | 34.8 (39.7%)                                                         | 14.5%                                                | 23.9%                                                           |
| Northwest China | 158.4                                | 95.8 (60.5%)                                                         | 26.8%                                                | 67.5%                                                           |
| Total           | 1157.9                               | 617.6 (53.3%)                                                        | 17.3%                                                | 37.9%                                                           |

\*Soil NO emissions given in this table are based on the default temperature dependence factor.



**Table S6** Comparison of observed and simulated values in China and five key regions.

|                                  | <b>China</b> | <b>NCP</b> | <b>YRD</b> | <b>PRD</b> | <b>Sichuan Basin</b> | <b>Northeast</b> |
|----------------------------------|--------------|------------|------------|------------|----------------------|------------------|
| OBS ( $\mu\text{g}/\text{m}^3$ ) | 129.6        | 172.4      | 146.5      | 97.5       | 108.3                | 126.1            |
| MOD ( $\mu\text{g}/\text{m}^3$ ) | 146.7        | 185.7      | 171.5      | 108.4      | 146.7                | 128.4            |
| MB ( $\mu\text{g}/\text{m}^3$ )  | 17.1         | 13.3       | 25.0       | 10.9       | 38.5                 | 2.4              |
| NMB (%)                          | 13.2         | 7.7        | 17.1       | 11.2       | 35.5                 | 1.9              |
| R                                | 0.89         | 0.77       | 0.80       | 0.58       | 0.62                 | 0.83             |

**Table S7** Comparison of soil NO emissions and flux in China reported by previous studies.

| Reference           | Region | Reference year | Above canopy (Gg N a <sup>-1</sup> )  | Soil NO <sub>x</sub> flux (ng N m <sup>-2</sup> s <sup>-1</sup> )                                                                                                           | Notes                                                                                                                                                             |
|---------------------|--------|----------------|---------------------------------------|-----------------------------------------------------------------------------------------------------------------------------------------------------------------------------|-------------------------------------------------------------------------------------------------------------------------------------------------------------------|
| Wang et al. (2005)  | China  | 1999           | 657                                   | generally more than 40 ng N m <sup>-2</sup> s <sup>-1</sup> (in the North China Plain in July) and 20 ng N m <sup>-2</sup> s <sup>-1</sup> (in the northeast China in July) | An empirical modeling approach of Yienger and Levy (YL95)                                                                                                         |
| Tie et al. (2006)   | China  | 2004           | 1375                                  |                                                                                                                                                                             | Dynamical and biogenic emissions models, soil emissions parameterized with an exponential dependence on soil temperature.                                         |
| Yan et al. (2005)   | China  |                | 480                                   |                                                                                                                                                                             | Statistical model based on field measurements of NO <sub>x</sub> fluxes combined with land cover, soil pH, soil organic carbon, climate, and nitrogen fertilizers |
| Huang and Li (2014) | China  |                | 1226 (ranging from 588.24 to 2132.05) |                                                                                                                                                                             | Synthesis of 130 NO emissions sampling points at 14 locations to estimate soil NO emissions inventory in China.                                                   |
| Lu et al. (2019)    | China  | 2016 (Mar-Oct) | 1140                                  |                                                                                                                                                                             | BDSNP scheme in GEOS-Chem                                                                                                                                         |
|                     |        | 2017 (Mar-Oct) | 1360                                  |                                                                                                                                                                             |                                                                                                                                                                   |

|                    |                       |           |                                   |                                                                                                        |                                                                                                                 |
|--------------------|-----------------------|-----------|-----------------------------------|--------------------------------------------------------------------------------------------------------|-----------------------------------------------------------------------------------------------------------------|
| Lu et al. (2021)   | China                 | 2017      | 770±40                            |                                                                                                        | BDSNP scheme in GEOS-Chem                                                                                       |
| Wang et al. (2007) | East China            | 1997-1999 | 850                               |                                                                                                        | Application of YL95 scheme in GEOS-Chem                                                                         |
| Lin (2012)         | East China            | 2006      | 380                               |                                                                                                        | Top-down estimates using satellite NO <sub>2</sub> retrievals                                                   |
| Wang et al. (2022) | The North China plain | 2020      |                                   | 10-40 (crop growing season)                                                                            | Application of MEGAN scheme in WRF-Chem                                                                         |
| Li and Wang (2007) | the Pearl River Delta | 2005      |                                   | The average is 47.5 (typical vegetable plot)                                                           | NO flux measured by static chamber technique in the suburbs of Guangzhou                                        |
| Li et al. (2007)   | South China           | 2005      |                                   | The average fluxes of broadleaved forest and pine-leaved forest in the rainy season were 14.9 and 17.1 | Sample plots circled in the forest and NO fluxes measured by dynamic flow chamber technique                     |
| Liu et al. (2011)  | Northern China        | 2007-2009 |                                   | Average annual flux of 7.6 (wheat-maize rural)                                                         | Experiments NO fluxes were obtained based on automatic measurement systems and intermittent manual measurements |
| Liu et al. (2017)  |                       |           |                                   | The average soil NO flux was 12.9<br>Vegetable farmland flux is 30.9                                   | Synthesized 520 field observations from 114 publications                                                        |
| This study         | China                 | 2018      | 805.2<br>1157.9<br>(715.7-1902.6) | 6.6 (June average, same below)<br>9.9                                                                  | BDSNP scheme (default fertilizer data)<br>BDSNP scheme (N + compound fertilizer data)                           |

|     |      |                        |      |                                                                           |
|-----|------|------------------------|------|---------------------------------------------------------------------------|
|     |      | 296.1                  | 38.5 | BDSNP scheme (default fertilizer data)                                    |
| NCP | 2018 | 455.9<br>(276.5-762.1) | 60.1 | BDSNP scheme (N + compound fertilizer data)                               |
|     |      |                        | 35.4 | BDSNP scheme (N + compound fertilizer data<br>and adjusted $\beta$ value) |

---

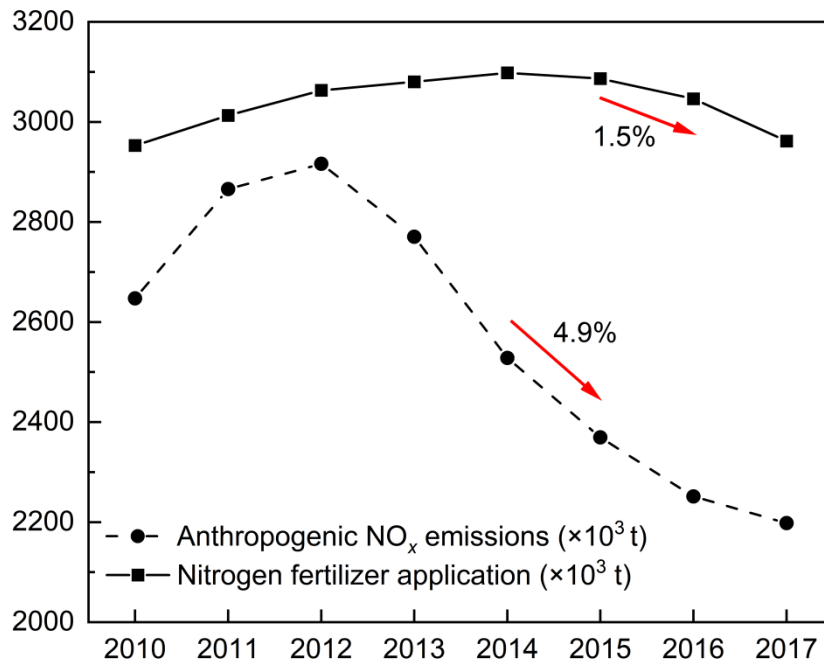

**Figure S1:** Anthropogenic  $\text{NO}_x$  emissions and nitrogen fertilizer application during 2010—2017 (Note: anthropogenic  $\text{NO}_x$  emissions are based on MEIC emission inventory; nitrogen fertilizer data from provincial statistical yearbook).

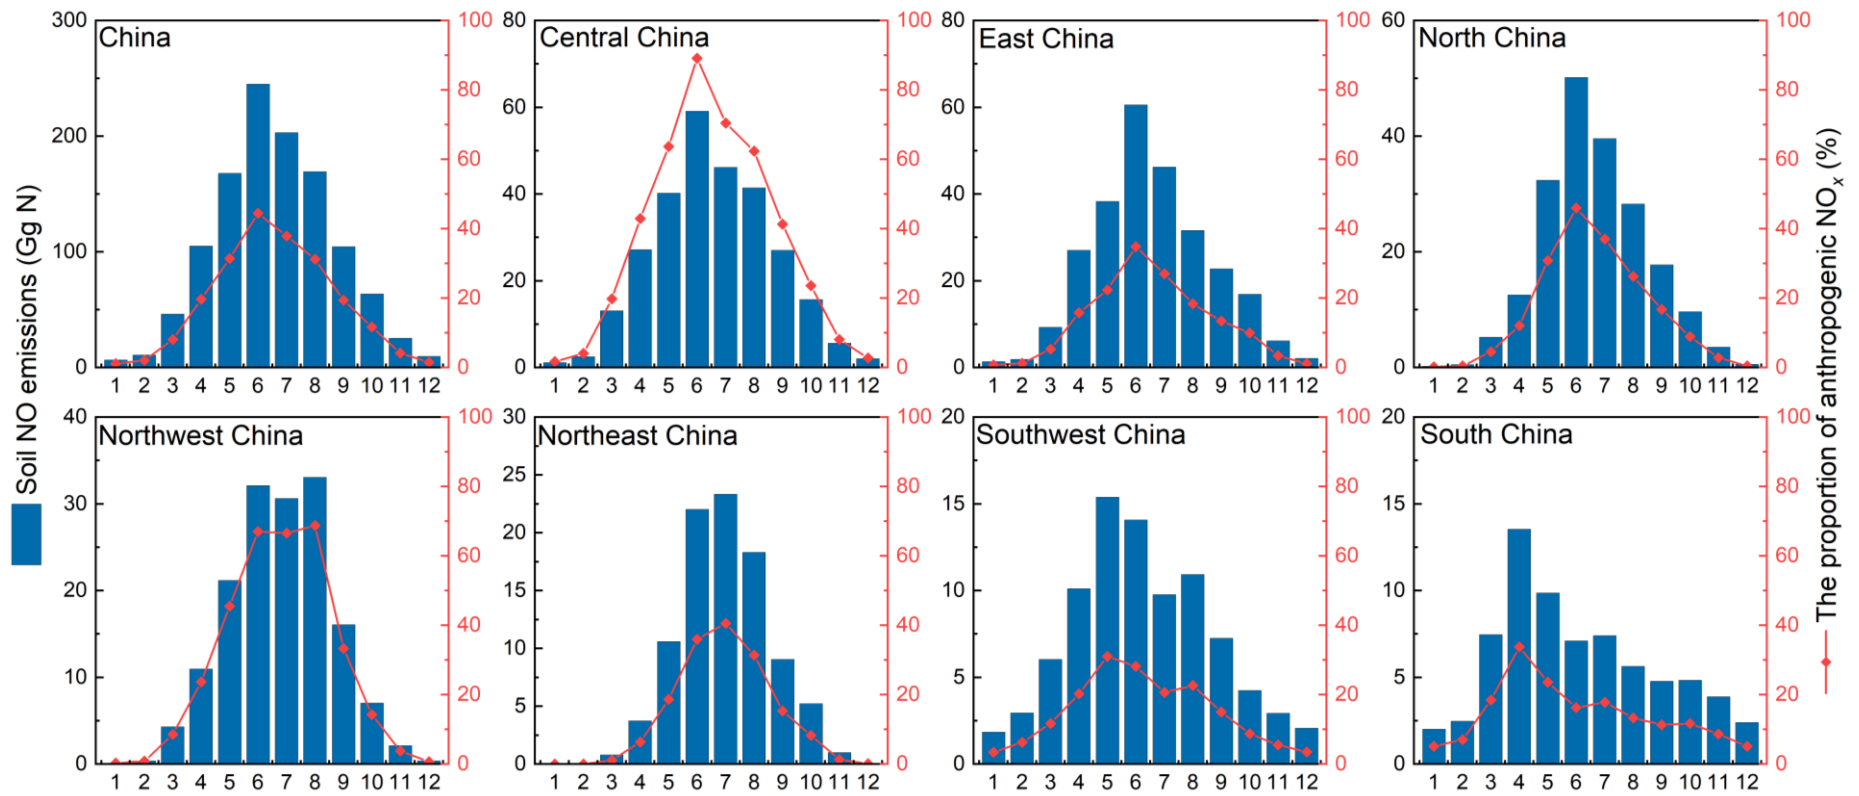

**Figure S2:** Monthly soil NO emissions (estimated with default temperature dependence factor of 0.103) by region.

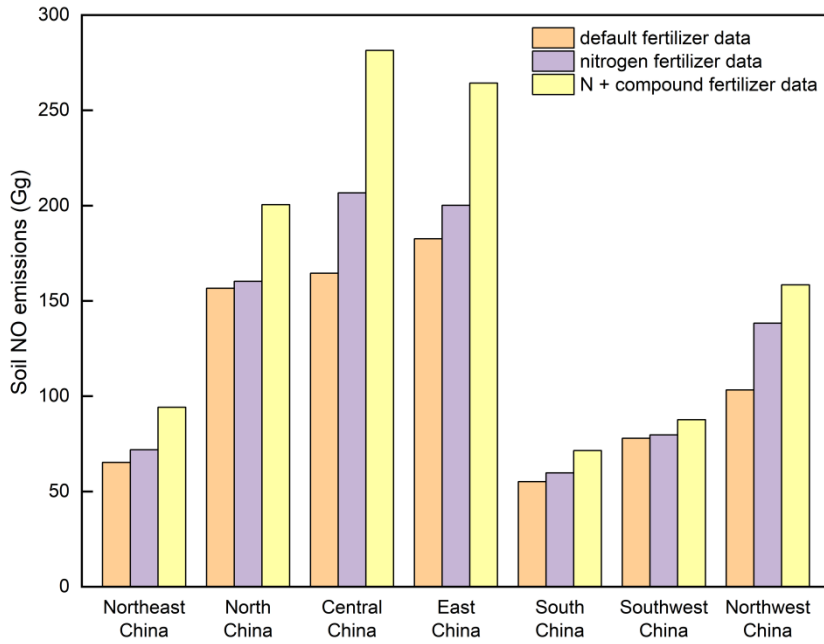

**Figure S3:** Soil NO emissions estimated using different fertilizer data (default fertilizer data: International Fertilizer Industry Association from Potter et al. (2010) for year 2010; nitrogen fertilizer and compound fertilizer are from statistical yearbooks at the provincial level for year 2018).

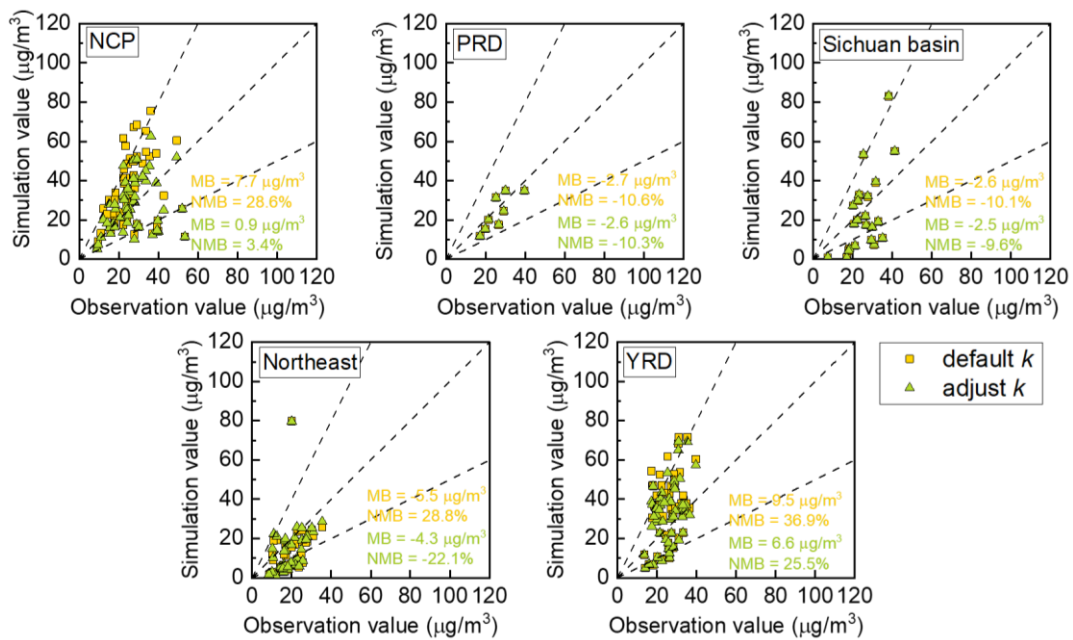

**Figure S4:** Scatter plot of monthly mean  $\text{NO}_2$  concentration (before and after adjusting  $k$ ).

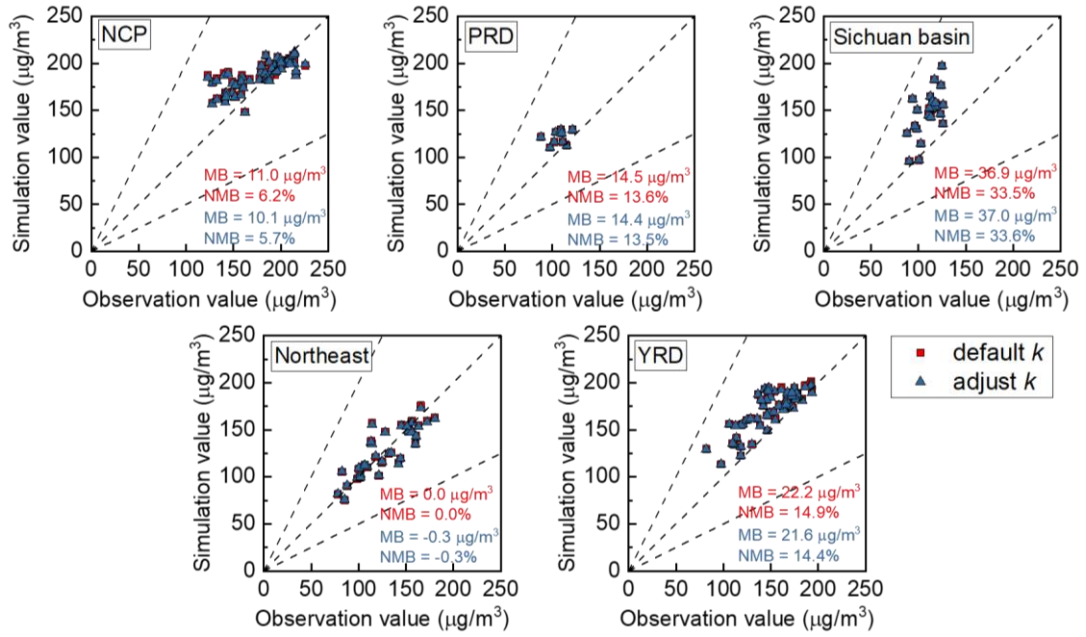

**Figure S5:** Scatter plot of monthly mean MDA8 ozone concentration (before and after adjusting  $k$ ).

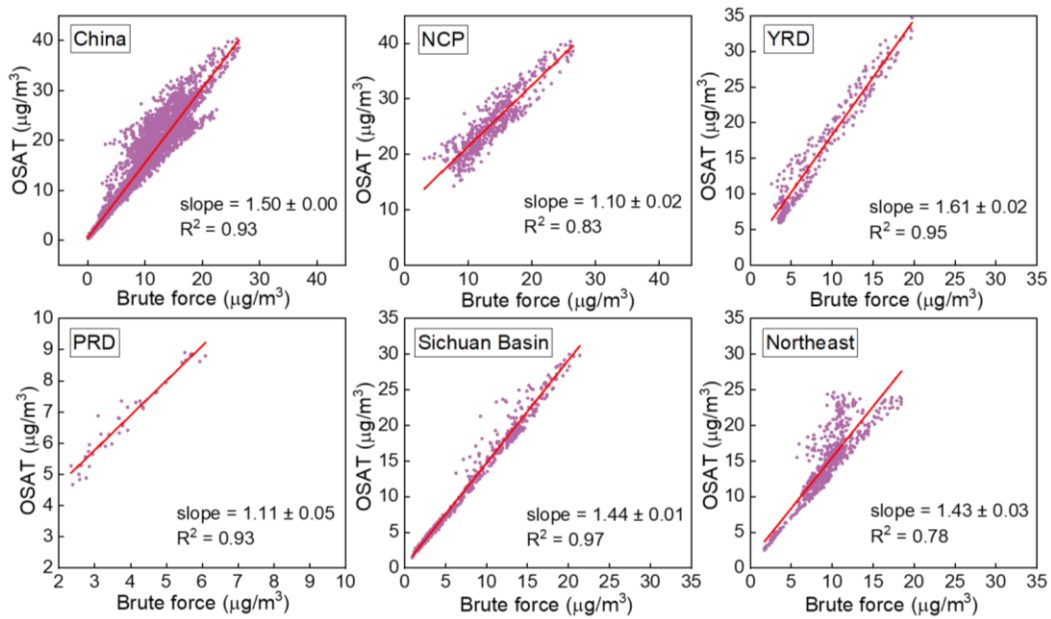

**Figure S6:** Comparison of OSAT method and Brute force method in China and five key regions.



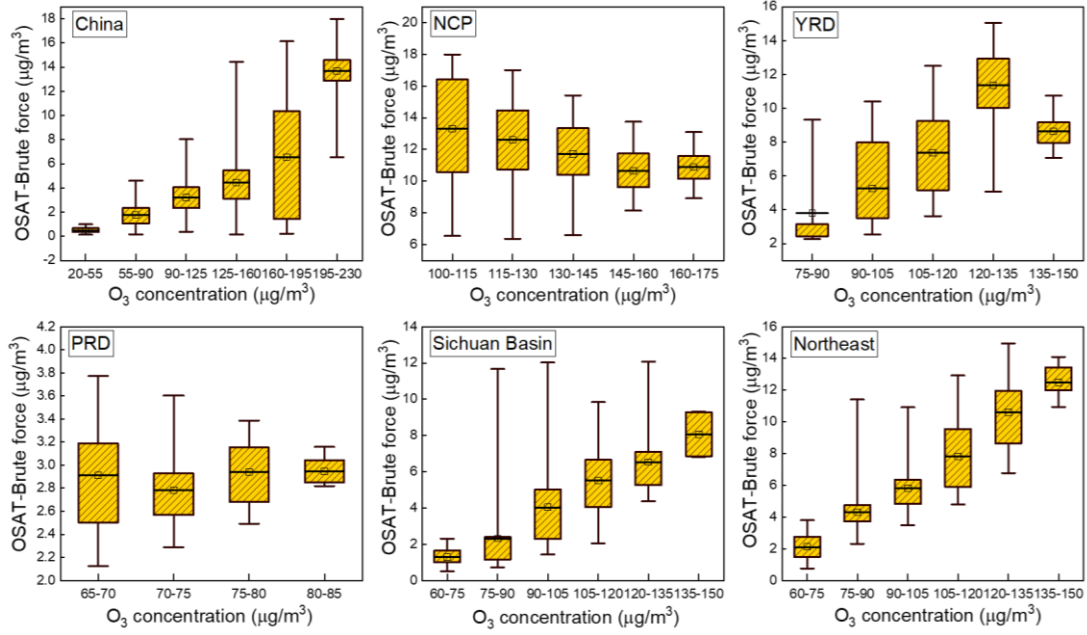

**Figure S7:** Ozone differences between OSAT method and brute force method under different ozone concentrations in China and five key regions.

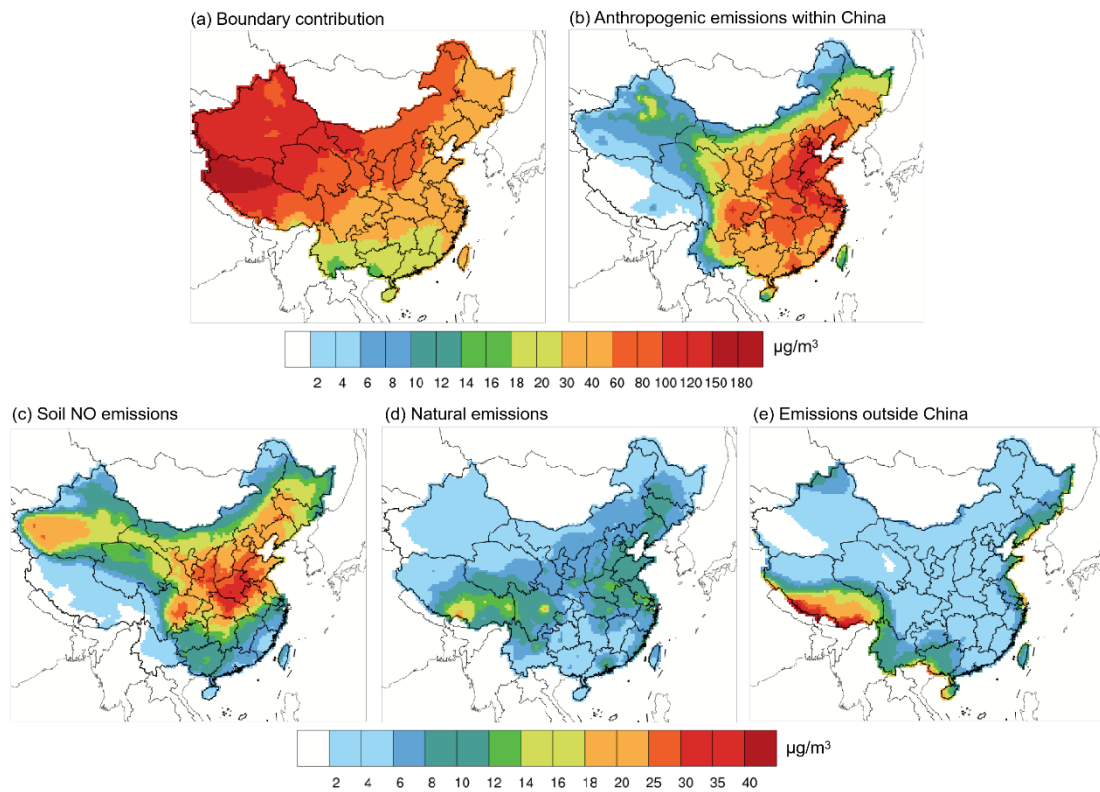

**Figure S8:** Spatial distribution of ozone contribution from different source groups based on OSAT results.

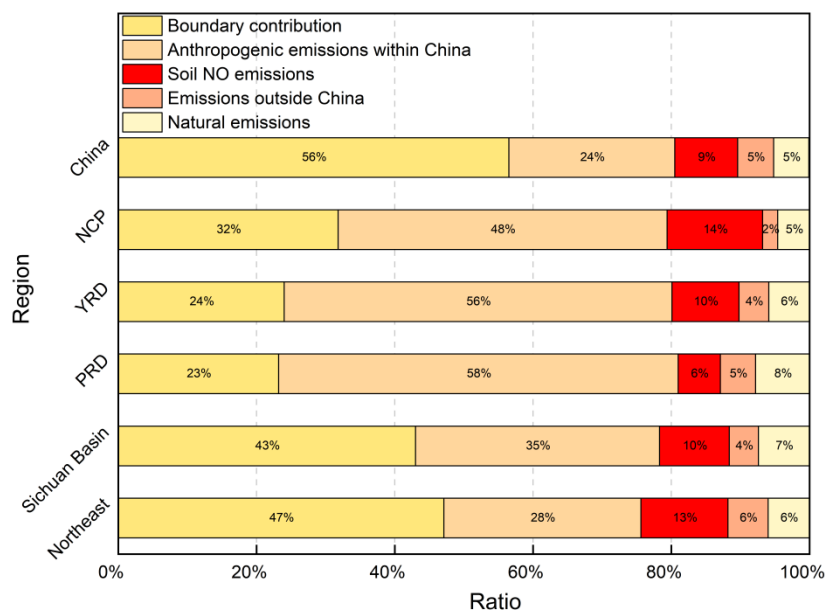

**Figure S9:** Relative ozone contribution by emission groups and regions.

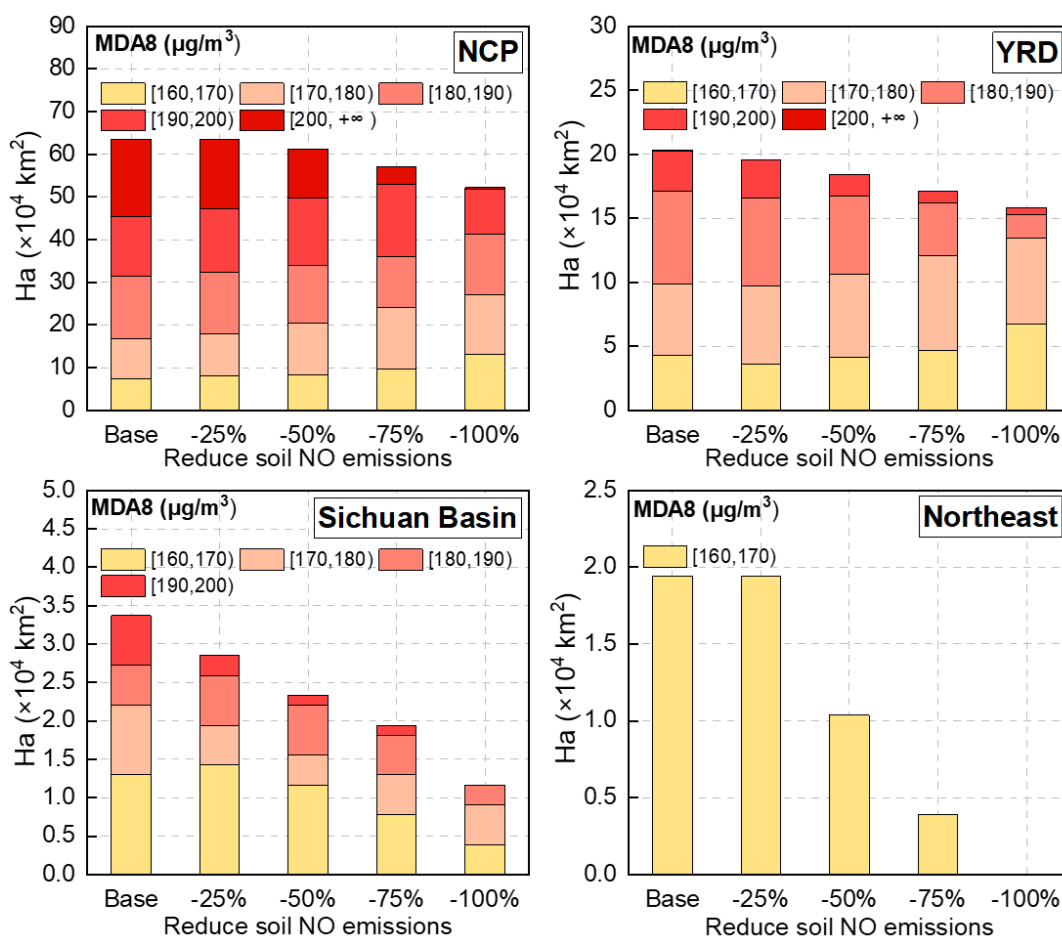

**Figure S10:** Area exposed to MDA8 > 160 µg/m<sup>3</sup> under different soil NO emission reduction scenarios (PRD is not shown because MDA8 ozone concentration is less than 160 µg/m<sup>3</sup>).

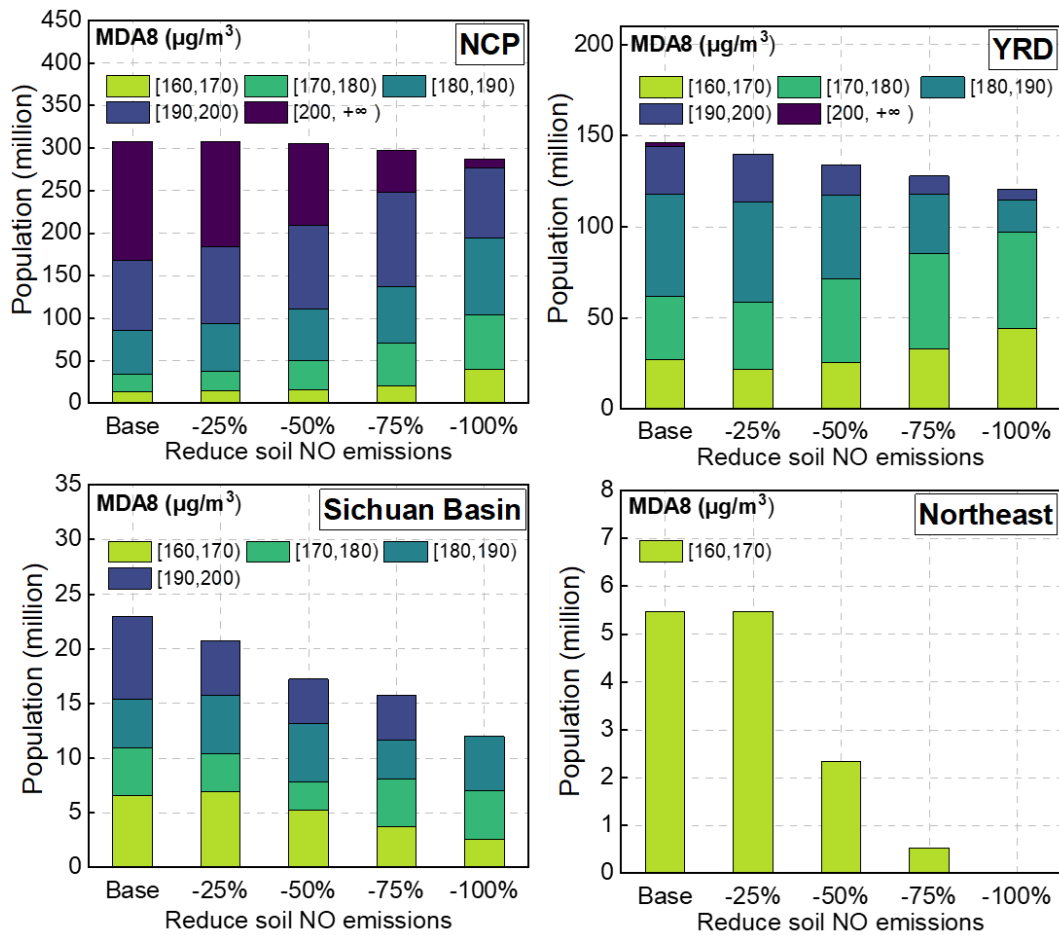

**Figure S11:** Population exposed to MDA8 > 160 µg/m<sup>3</sup> under different soil NO emission reduction scenarios (PRD is not shown because MDA8 ozone concentration is less than 160 µg/m<sup>3</sup>).

## References:

- Chang, J., Brost, R., Isaksen, I., Madronich, S., Middleton, P., Stockwell, W., and Walcek, C.: A three-dimensional Eulerian acid deposition model: Physical concepts and formulation, *Journal of Geophysical Research: Atmospheres*, 92, 14681-14700, 1987.
- Ek, M., Mitchell, K., Lin, Y., Rogers, E., Grunmann, P., Koren, V., Gayno, G., and Tarpley, J.: Implementation of Noah land surface model advances in the National Centers for Environmental Prediction operational mesoscale Eta model, *Journal of Geophysical Research: Atmospheres*, 108, 2003.
- Emmons, L. K., Walters, S., Hess, P. G., Lamarque, J.-F., Pfister, G. G., Fillmore, D., Granier, C., Guenther, A., Kinnison, D., and Laepple, T.: Description and evaluation of the Model for Ozone and Related chemical Tracers, version 4 (MOZART-4), *Geoscientific Model Development*, 3, 43-67, 2010.
- Hong, S.-Y., Noh, Y., and Dudhia, J.: A new vertical diffusion package with an explicit treatment of entrainment processes, *Monthly weather review*, 134, 2318-2341, 2006.
- Huang, Y. and Li, D.: Soil nitric oxide emissions from terrestrial ecosystems in China: a synthesis of modeling and measurements, *Scientific Reports*, 4, 1-8, 2014.
- Iacono, M. J., Delamere, J. S., Mlawer, E. J., Shephard, M. W., Clough, S. A., and Collins, W. D.: Radiative forcing by long-lived greenhouse gases: Calculations with the AER radiative transfer models, *Journal of Geophysical Research: Atmospheres*, 113, 2008.
- Li, D. and Wang, X.: Nitric oxide emission from a typical vegetable field in the Pearl River Delta, China, *Atmospheric Environment*, 41, 9498-9505, 2007.
- Li, D., Wang, X., Mo, J., Sheng, G., and Fu, J.: Soil nitric oxide emissions from two subtropical humid forests in south China, *Journal of Geophysical Research: Atmospheres*, 112, 2007.
- Lin, J.-T.: Satellite constraint for emissions of nitrogen oxides from anthropogenic, lightning and soil sources over East China on a high-resolution grid, *Atmospheric Chemistry and Physics*, 12, 2881-2898, 2012.
- Liu, C., Wang, K., Meng, S., Zheng, X., Zhou, Z., Han, S., Chen, D., and Yang, Z.: Effects of irrigation, fertilization and crop straw management on nitrous oxide and nitric oxide emissions from a wheat–maize rotation field in northern China, *Agriculture, Ecosystems & Environment*, 140, 226-233, 2011.
- Liu, S., Lin, F., Wu, S., Ji, C., Sun, Y., Jin, Y., Li, S., Li, Z., and Zou, J.: A meta-analysis of fertilizer-induced soil NO and combined NO+ N<sub>2</sub>O emissions, *Global Change Biology*, 23, 2520-2532, 2017.
- Lu, X., Ye, X., Zhou, M., Zhao, Y., Weng, H., Kong, H., Li, K., Gao, M., Zheng, B., and Lin, J.: The underappreciated role of agricultural soil nitrogen oxide emissions in ozone pollution regulation in North China, *Nature communications*, 12, 5021, 2021.
- Lu, X., Zhang, L., Chen, Y., Zhou, M., Zheng, B., Li, K., Liu, Y., Lin, J., Fu, T.-M., and Zhang, Q.: Exploring 2016–2017 surface ozone pollution over China: source contributions and meteorological influences, *Atmospheric Chemistry and Physics*, 19, 8339-8361, 2019.
- Morrison, H., Thompson, G., and Tatarskii, V.: Impact of cloud microphysics on the development of trailing stratiform precipitation in a simulated squall line: Comparison of one-and two-moment schemes, *Monthly weather review*, 137, 991-1007, 2009.
- Potter, P., Ramankutty, N., Bennett, E. M., and Donner, S. D.: Characterizing the spatial patterns of global fertilizer application and manure production, *Earth interactions*, 14, 1-22, 2010.

Tie, X., Li, G., Ying, Z., Guenther, A., and Madronich, S.: Biogenic emissions of isoprenoids and NO in China and comparison to anthropogenic emissions, *Science of the total environment*, 371, 238-251, 2006.

Wang, Q. g., Han, Z., and Higano, Y.: An inventory of nitric oxide emissions from soils in China, *Environmental pollution*, 135, 83-90, 2005.

Wang, R., Bei, N., Wu, J., Li, X., Liu, S., Yu, J., Jiang, Q., Tie, X., and Li, G.: Cropland nitrogen dioxide emissions and effects on the ozone pollution in the North China plain, *Environmental Pollution*, 294, 118617, 2022.

Wang, Y., McElroy, M. B., Martin, R. V., Streets, D. G., Zhang, Q., and Fu, T. M.: Seasonal variability of NO<sub>x</sub> emissions over east China constrained by satellite observations: Implications for combustion and microbial sources, *Journal of Geophysical Research: Atmospheres*, 112, 2007.

Yan, X., Ohara, T., and Akimoto, H.: Statistical modeling of global soil NO<sub>x</sub> emissions, *Global Biogeochemical Cycles*, 19, 2005.

Yarwood, G., Jung, J., Whitten, G. Z., Heo, G., Mellberg, J., and Estes, M.: Updates to the Carbon Bond mechanism for version 6 (CB6), 9th Annual CMAS Conference, Chapel Hill, NC, 11-13,

Zhang, L., Brook, J. R., and Vet, R.: A revised parameterization for gaseous dry deposition in air-quality models, *Atmospheric Chemistry and Physics*, 3, 2067-2082, 2003.
